# Supplementary material
Source: HighWire-hosted journal article supplement (https://care.diabetesjournals.org/content/suppl/2007/09/05/dc07-0108)

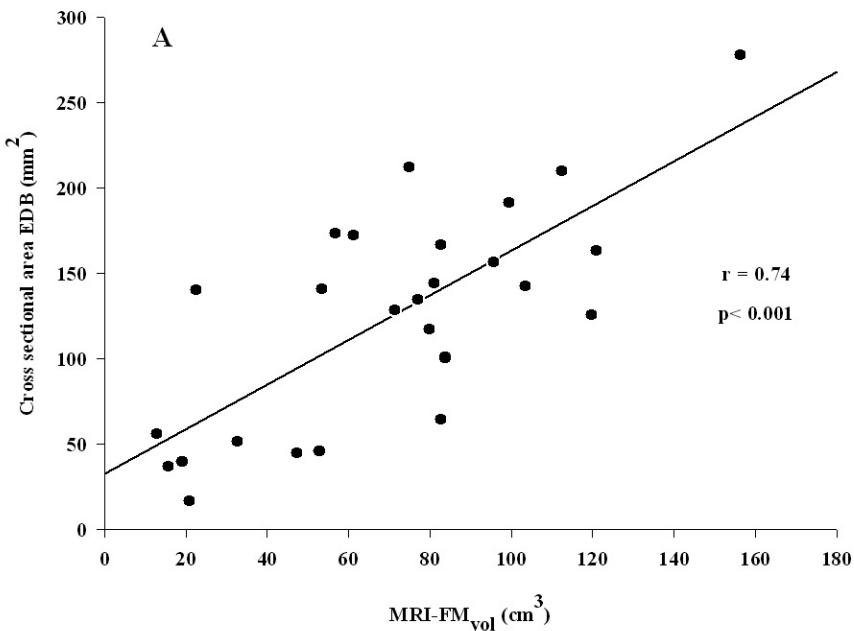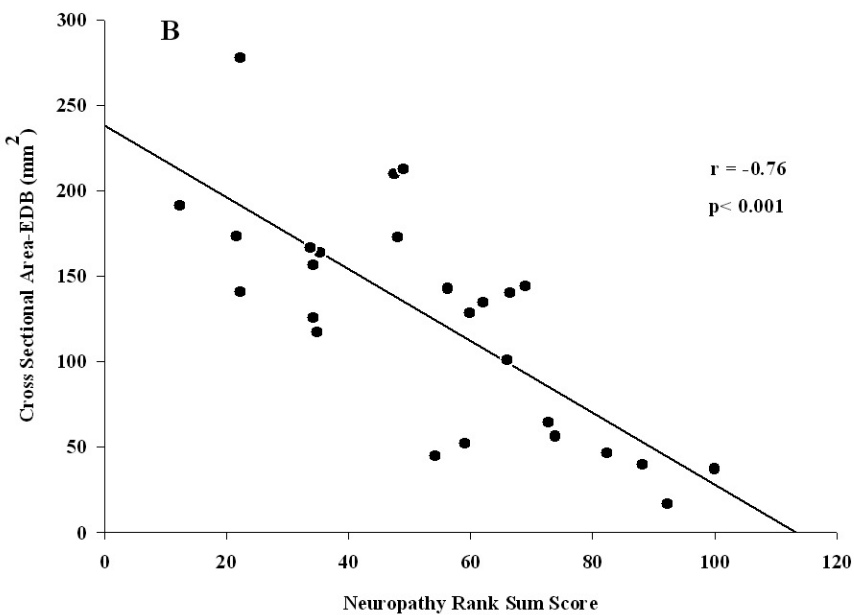

Supplement: DC070108OnlineAppenFig1.pdf [file DC070108OnlineAppenFig1.pdf]
